# Supplementary material
Source: publisher figshare collection journal article supplement (https://gsapubs.figshare.com/articles/dataset/_/23900253)
Supplement: Supplementary file 1 [file 1]

Lyster, S.J., Whittaker, A.C., Farnsworth, A., and Hampson, G.J., 2023, Constraining flow and sediment transport intermittency in the geological past: GSA Bulletin, <https://doi.org/10.1130/B36873.1>.

## Supplemental Material

**Supplemental Text S1.** Estimation of channel geometries, paleoflow conditions, uncertainty analysis, and HadCM3L General Circulation Model.

**Table S1.** Field localities visited in this study.

**Table S2.** Measured paleoflow depth indicators in terrestrial fluvial sandstone bodies of the Last Chance Ferron Sandstone.

**Table S3.** Field data collected in this study. The table is located in the attached Excel spreadsheet in the sheet named “Data”.

# Supplement to: *Constraining flow and sediment transport intermittency in the geological past*

Sinéad J. Lyster<sup>1,2,\*</sup>, Alexander C. Whittaker<sup>2</sup>, Alex Farnsworth<sup>3</sup> and Gary J. Hampson<sup>2</sup>

<sup>1</sup>Department of Geosciences, The Pennsylvania State University, Pennsylvania, USA.

<sup>2</sup>Department of Earth Science and Engineering, Imperial College London, UK.

<sup>3</sup>School of Geographical Sciences and Cabot Institute, University of Bristol, UK.

\*slyster@psu.edu

## **Contents:**

### **S1. Estimation of channel geometries**

### **S2. Paleoflow conditions**

### **S3. Uncertainty analysis**

### **S4. HadCM3L General Circulation Model**

### **S5. Field data**

## **S1. Estimation of channel geometries**

### **i. Bedform heights**

We used field measurements of dune-scale cross-set thicknesses,  $b_{xs}$ , to estimate mean original bedform (i.e., dune) heights,  $b_d$ . In doing so, we assumed the bedform preservation ratio, defined as the ratio of  $b_{xs}$  to  $b_d$ , i.e.,  $b_{xs}/b_d$ , is a value between 0.3 and 0.7. Typically,  $b_{xs}/b_d$  is assumed to be a constant of  $\sim 0.3$  in steady-state conditions, but can be up to 0.7 or higher in disequilibrium conditions (Paola & Borgman, 1991; Leclair & Bridge, 2001; Leclair, 2002; Jerolmack & Mohrig, 2005; Reesink et al., 2015; Ganti et al., 2020; Leary & Ganti, 2020). Lyster et al. (2022) presented evidence for enhanced bedform preservation under disequilibrium conditions in channel deposits of the Last Chance Ferron Sandstone, and we therefore assumed that  $b_{xs}/b_d$  can vary between 0.3 and 0.7 in our analyses.

### **ii. Flow depths**

To estimate flow depth,  $H$ , we used field measurements of select channel architectural elements as proxies for  $H$ . At field localities, which are reported in Table S1, we measured bar-scale clinoform heights and maximum thicknesses of single channel storeys (Tables S2 and S3). We also gathered data from literature (Tables S2 and S3). Where bar-scale clinoforms are fully preserved, they provide a minimum estimate for the maximum flow depth (e.g., Hajek & Heller, 2012). However, we note that measured bar-scale clinoforms were not necessarily fully-preserved, and may have been partially-preserved (c.f. Chamberlin and Hajek (2019)), and that our measurements do not account for compaction, which may add c. 10% to the estimated height (e.g., Allen, 1965). Importantly, we highlight that estimates of  $H$  derived from the

heights of channel architectural elements have previously been corroborated using independent bedform-scale approaches to estimate  $H$  (c.f. Lyster et al., 2022).

### iii. Channel width

In the Last Chance Ferron Sandstone, the most paleo-landward localities preserve terrestrial fluvial deposits of major meandering trunk channels that fed the Last Chance fluvial-deltaic complex. For these deposits, Bhattacharya and Tye (2004) reported channel widths of 250 m. Further, Garrison Jr and van den Bergh (2004) noted that channels had average widths of 250 m, and that measured channel-belt widths did not exceed 2 km. These authors collectively found no evidence to suggest that channel widths in Last Chance Ferron trunk channels exceeded a few hundred metres. To allow for uncertainty, we prescribed a range of channel widths spanning 200–300 m.

### iv. Paleoslope

To reconstruct paleoslope we used the empirical approach of Trampus et al. (2014) which, for sand-grade deposits, has been demonstrated to recover paleoslope values that are similar to paleoslope values recovered using a Shields stress inversion (Ganti et al., 2019; Lyster et al., 2021). Following Trampus et al. (2014), we estimated paleoslope,  $S$ , as

$$\log S = \alpha_0 + \alpha_1 \log D + \alpha_2 \log H, \quad \text{Eq. S1}$$

where  $\alpha_0 = -2.08 \pm 0.036$ ,  $\alpha_1 = 0.254 \pm 0.016$ , and  $\alpha_2 = -1.09 \pm 0.044$  are constants, and  $D$  is grain size (as described in the main text).

## S2. Estimation of paleoflow conditions

### i. Flow characteristics

To calculate the instantaneous channel-forming water discharge,  $Q_{w(cf)}$ , and bed material load,  $Q_{bm(cf)}$ , we first calculated flow velocity,  $U$ , using the Chézy formulae for hydraulic flow resistance:

$$C_z \equiv \frac{U}{u_*} = C_f^{-\frac{1}{2}}, \quad \text{Eq. S2}$$

where  $C_z$  is a Chézy friction coefficient,  $C_f$  is a dimensionless bed resistance coefficient, and  $u_*$  is the bed shear velocity ( $u_* = gHS^{0.5}$ , where  $g$  is acceleration due to gravity). To solve for  $U$ , we calculated  $C_f$  using the Manning–Strickler formulation:

$$C_f^{-1/2} = \alpha_r \left( \frac{H}{k_s} \right)^{\frac{1}{6}}, \quad \text{Eq. S3}$$

where  $\alpha_r$  is a dimensionless constant between 8 and 9 and  $k_s$  is the skin friction height (or, the grain roughness height). For sand-bed streams  $\alpha_r = 8.32$  is often used (Wright & Parker, 2004). Meanwhile,  $k_s$  is

approximated as  $k_s \cong n_k D_{90}$ , where  $n_k$  is a dimensionless number between 1.5 and 3 and  $D_{90}$  is the 90<sup>th</sup> percentile of grain size. We assume  $n_k=3$  following Wright and Parker (2004) and van Rijn (1984), and we substituted  $D$  for  $D_{90}$ , given the difficulty of measuring the  $D_{90}$  of sand-grade deposits in the field — we anticipate the effect of this assumption is negligible given that we implement generous uncertainty margins (see Section S3).

We then calculated instantaneous channel-forming water discharge,  $Q_{w(cf)}$ , as:

$$Q_{w(cf)} = UHW, \quad \text{Eq. S4}$$

where  $U$  is the flow velocity, which we calculated using Chézy formulae (Equations S2 and S3), and where  $H$  and  $W$  were determined from primary and secondary field data, described previously.

## ii. Form drag correction

Equations S2 and S3 (and, therefore, S4) assume that all drag force exerted on the river bed is skin friction, i.e., they are skin friction predictors. In the absence of bedforms all drag force exerted on riverbeds is skin friction, however the presence of bedforms exerts additional form drag which acts normal to river beds. Use of a skin friction predictor is problematic as it acts to overestimate shear stress on the river bed (e.g., Andrews, 1984; Kean & Smith, 2006) and is in direct conflict with ubiquitous cross-bedding in terrestrial fluvial sandstone bodies of the Last Chance Ferron Sandstone.

In sediment transport models, form drag is accounted for analytically by “removing” the portion of flow depth affected by form drag. The flow depth of a river,  $H$ , can be considered a composite flow depth,  $H_c$ , which is the flow depth due to both skin friction and form drag. It is possible to calculate a skin friction flow depth,  $H_{sk}$ , which is the flow depth due to skin friction alone, i.e., the portion of the flow depth that is unaffected by form drag. The predictor of Wright and Parker (2004) is an empirical predictor of the Shields stress due to skin friction,  $\tau_{sk}^*$ , where

$$\tau_{sk}^* = 0.05 + 0.7(\tau^* Fr^{0.7})^{0.8}, \quad \text{Eq. S5}$$

and where  $Fr$  is the Froude number ( $Fr=U/gH^{0.5}$ ). We solved for  $\tau_{sk}^*$  iteratively. We iterated values of  $H_{sk}$  between 0 and  $H$  and for each value of  $H_{sk}$  we calculated: (1) the skin friction bed shear velocity,  $u_{sk}^*$ , as  $u_{sk}^*=gH_{sk}S^{0.5}$ ; (2) the skin friction Shields stress,  $\tau_{sk}^*$ , as  $\tau_{sk}^*=H_{sk}S/RD$ ; (3) a constant  $T$ , as  $T=(\tau_{sk}^*-0.05/0.7)^{5/4}$ ; (4) the skin friction flow velocity,  $U_{sk}$ , using  $H_{sk}$  and Equations S1 and S2; and (5) the composite flow depth,  $H_c$ , as  $H_c=(T(RD/S)(g^{0.5}/U_{sk})^{0.7})^{20/13}$ . We iterated through values of  $H_{sk}$  until we found the value of  $H_{sk}$  such that  $H_c$  is equal to  $H$ . This methodology is outlined in detail in Parker (2004).

As  $k_s$  is a skin friction roughness height, we then calculated the composite roughness height,  $k_c$ , following Parker (2004) as

$$k_c = \frac{11H}{e^{\kappa C_z}}, \quad \text{Eq. S6}$$

where  $\kappa$  is the von Karman constant, taken as 0.4, and where  $C_z$  is the skin friction  $C_z$  (Equation S1).

### iii. Suspended fraction of the bed material load

Prior to calculating the suspended fraction of the bed material load, we first calculated the sediment settling velocity,  $w_s$ , following Ferguson and Church (2004), as

$$w_s = \frac{RgD^2}{C_1\nu + (0.75C_2RgD^3)^{0.5}}, \quad \text{Eq. S7}$$

where  $C_1$  and  $C_2$  are constants associated with grain sphericity and roundness ( $C_1 = 18$  and  $C_2 = 1$  for natural grains; c.f. Ferguson and Church (2004)), and subsequently calculated the Rouse number,  $Z$ , as

$$Z = \frac{w_s}{\beta\kappa u_*}, \quad \text{Eq. S8}$$

where  $\beta$  is a constant that correlates eddy viscosity to eddy diffusivity, typically taken as 1.

Several relations have been proposed to calculate the entrainment,  $E$ , of uniform material (see review by García and Parker (1991)), which is effectively the concentration of suspended sediment at the reference height or level,  $a$ . While various entrainment relations exist (e.g., van Rijn, 1984; García & Parker, 1991; Wright & Parker, 2004), we used the relation of Wright and Parker (2004) which best suits larger, low-sloping sand-bed rivers. Using the value of  $u_{*sk}^*$  that resulted in  $H_c=H$ , Wright and Parker (2004) calculate entrainment as

$$E = \frac{AZ_u^5}{1 + \frac{A}{0.3}Z_u^5}, \quad Z_u = \frac{u_{*sk}}{w_s} Re_p^{0.6} S^{0.7}, \quad \text{Eq. S9}$$

where  $A=5.7 \times 10^{-7}$ . We then computed the Rouse-Vanoni profile for suspended sediment as

$$I = \int_{\zeta_b}^1 \left[ \frac{(1-\zeta)/\zeta}{(1-\zeta_b)/\zeta_b} \right]^Z \ln \left( 30 \frac{H}{k_c} \zeta \right) d\zeta, \quad \text{Eq. S10}$$

where  $b$  is  $a/H$ ,  $a = 0.05H$  (so  $b=0.05$ ), and  $\zeta$  is the dimensionless vertical coordinate in the channel cross-section (i.e.,  $\zeta=0$  on the bed surface and  $\zeta=1$  at the flow depth,  $H$ ). Finally, we calculated the instantaneous suspended fraction of the bed material load,  $Q_{bm(s)}$ , for channel-forming conditions in units of  $m^2/s$  as

$$Q_{bm(s)} = \frac{u_* EH}{\kappa} I. \quad \text{Eq. S11}$$

This framework recovers an instantaneous channel-forming discharge that is specific to the suspended bed material load, i.e., the portion of the bed material load that is intermittently suspended in the water column. It is not appropriate to refer to this value as a suspended sediment load. At present, the suspended bed material load has been reconstructed per unit width, which we multiplied by channel width,  $W$ , to recover the total suspended bed material load.

#### iv. Bedload fraction of the bed material load

To calculate the instantaneous bedload fraction of the bed material load,  $Q_{bm(b)}$ , for channel-forming conditions, we used the relation of Mahon and McElroy (2018). This model is a bedform-scale model in which the unit bedload flux is calculated geometrically, per unit width. To implement this model, we first calculated the characteristic bedform migration velocity,  $V_c$ , prior to calculating the unit bedload flux (i.e.,  $Q_{bm(b)}$ ). These variables are given as:

$$\log V_c = \beta_0 + \beta_1 \log S, \quad \text{Eq. S12}$$

$$Q_{bm(b)} = (1 - \varphi) \frac{h_d V_c}{2}, \quad \text{Eq. S13}$$

where  $\beta_0 = 0.6113 \pm 0.144$  and  $\beta_1 = 1.305 \pm 0.0515$  are constants, and where  $\varphi$  is a dimensionless bed porosity of 0.5 (c.f. Mahon & McElroy, 2018). At present, the bedload fraction of the bed material load has been reconstructed per unit width, which we multiplied by channel width,  $W$ , to recover the total bedload fraction of the bed material load.

#### v. Total bed material load

With estimates of both  $Q_{bm(b)}$  and  $Q_{bm(s)}$  for channel-forming conditions, we calculated the instantaneous channel-forming bed material load,  $Q_{bm(cf)}$ , as:

$$Q_{bm(cf)} = Q_{bm(b)} + Q_{bm(s)}. \quad \text{Eq. S14}$$

### S3. Uncertainty analysis

To account for variability and uncertainty in model inputs and parameters we implemented a Monte Carlo uncertainty propagation scheme. For each model input and parameter throughout Equations 1–8 in the main text, and in Equations S1–S14, we implemented a range of values. Specifically, we generated  $10^6$  random samples between bounds defined by this range. We generated samples from a uniform distribution in order to be as conservative as possible with uncertainty, and to avoid introduction of additional assumptions where the shape and the scale of the full distribution of the data is unknown (e.g., Equations S1 and S12). In propagating these randomly generated samples through Equations 1–8 and S1–S14, we recovered  $10^6$  plausible values for each reconstructed parameter and, therefore, we recovered  $10^6$  plausible values for the flow intermittency factor,  $I_w$ , and the sediment transport intermittency factor,  $I_s$ .

For model inputs that reflect field data, we determined this range using the mean ( $\mu$ ) and standard deviation ( $\sigma$ ) of the data. We extracted  $\mu$  and  $\sigma$  of sand-fraction grain sizes, gravel-fraction grain sizes, cross-set thicknesses, and channel architectural element thicknesses (i.e., flow depth proxies). For each of these datasets, we set bounds defined by  $\mu$  and  $\sigma$ . To calculate sand-transporting flow conditions, which we

interpreted as the dominant channel-forming condition (given the predominance of sand-grade deposits throughout channel-fill facies), these bounds were defined by  $\mu - \sigma$  and  $\mu + \sigma$ . We interpreted gravel-transporting flow conditions as the least dominant channel-forming condition (due to the rare occurrence of gravel-grade deposits in channel-fill facies). However, we considered that gravel-transporting conditions potentially reflect the largest formative flow events preserved in the fluvial stratigraphy. To potentially simulate the largest formative flow events, we calculated gravel-transporting flow conditions using bounds defined by  $\mu$  and  $\mu + \sigma$ .

Meanwhile, for model inputs that reflect topographic data, we determined this range based on independent observations or constraints in published literature, as outlined in the main text. Further, for paleoclimate data, we determined this range using results of HadCM3L simulations, which is also outlined in the main text. Finally, for model parameters in Equations S1 and S12, we defined the bounds for constants  $\alpha_0$ ,  $\alpha_1$ ,  $\alpha_2$ ,  $\beta_0$ , and  $\beta_1$  as  $\mu - \sigma$  and  $\mu + \sigma$ , using the values given for  $\mu$  and  $\sigma$ .

#### **S4. HadCM3L General Circulation Model**

Here we employed HadCM3L, a coupled Atmosphere–Ocean General Circulation Model (AOGCM) similar to the widely used UKMO model HadCM3, but with a lower resolution ocean. HadCM3L (specifically HadCM3BL-M2.1aD; Valdes et al. (2017)) has a resolution of  $3.75^\circ$  longitude  $\times$   $2.5^\circ$  latitude in the atmosphere and ocean (equivalent to a cell size of  $278 \times 417$  km at the equator and  $278 \times 295$  km at  $45^\circ$  latitude), with 19 hybrid levels in the atmosphere and 20 vertical levels in the ocean with equations solved on the Arakawa B-grid with sub-grid scale processes (such as convection, cloud, orographic variance) parameterized. A dynamic vegetation model, TRIFFID (Top-down Representation of Interactive Foliage and Flora Including Dynamics; Cox et al. (1998)), predicts the life cycle and the distribution of vegetation using a plant functional type (PFT) approach for 5 different PFTs: broadleaf trees, needleleaf tree, C3 grass, C4 grass and shrubs. Grid-boxes are fractional and can contain a mixed coverage.

The model used in this study is very similar to the HadCM3BLM2.1aD model that is described and evaluated under modern climate configuration in Valdes et al. (2017), except that it includes a modification to the ozone profile which ensures that the model does not develop a runaway warming at  $\times 4$  preindustrial atmospheric  $\text{CO}_2$ , as discussed in Lunt et al. (2016). Relative to more recent and/or higher resolution GCMs, HadCM3L is fast and allows millennial and multi-millennial-scale integrations (Farnsworth et al., 2019), which is essential for deep-time modeling work where the initial condition may be far from the final equilibrium state. Recent work shows that deep-time GCMs require multi-thousand year integrations to fully represent applied boundary forcings (Farnsworth et al., 2019), and HadCM3L has been used successfully in numerous pre-Quaternary paleoclimate studies (Lunt et al., 2007; Tindall et al., 2010; Craggs et al., 2012; Lunt et al., 2016).

Boundary conditions for the HadCM3L model used here are those described in Farnsworth et al. (2019), with boundary conditions (topography, bathymetry, ice sheet, solar luminosity) set for the Turonian stage of the Late Cretaceous. Turonian HadCM3L results are also identical to those presented in Farnsworth et al. (2019). Atmospheric CO<sub>2</sub> was set at 1120 ppmv ( $\times 4$  preindustrial atmospheric CO<sub>2</sub>), which is within the range of the Foster et al. (2017) reconstruction. The simulation was run for 11,422 model years and has reached full equilibrium with ocean integral temperatures showing insignificant trends and a top-of-the-atmosphere net energy balance of 0.1 W/m<sup>2</sup>.

Results from Turonian HadCM3L simulations were resampled to a spatial resolution of 0.1° latitude  $\times$  0.1° longitude, which equates to a cell size of  $\sim 11 \times 11$  km, using a bilinear resampling technique. This facilitates visualization of spatial variation and enables selection of an appropriate range of values for paleoclimate variables required in this study.

## S5. Field data

**Table S1** | Field localities visited in this study

| Locations                 | Elevation, m ( $\pm 3-4$ ) |
|---------------------------|----------------------------|
| N38 40 18.9, W111 24 52.5 | 2255                       |
| N38 40 20, W111 24 45.3   | 2241                       |
| N38 40 21.7, W111 24 17.1 | 2218                       |
| N38 40 17.5, W111 24 12   | 2209                       |
| N38 40 12, W111 24 2.5    | 2190                       |
| N38 40 7.7, W111 23 50.3  | 2179                       |
| N38 40 9.1, W111 23 44.8  | 2187                       |
| N38 40 8.9, W111 23 53.6  | 2215                       |
| N38 34 50.9, W111 28 6.2  | 2668                       |
| N38 34 49, W111 28 6.5    | 2636                       |
| N38 34 48.9, W111 28 4.5  | 2631                       |
| N38 34 47.6, W111 28 5.4  | 2592                       |
| N38 34 35.1, W111 27 48.4 | 2537                       |
| N38 44 0.4, W111 18 47.2  | 1965                       |
| N38 43 37.4, W111 18 46.5 | 1926                       |
| N38 43 25.2, W111 18 45.9 | 1895                       |



**Table S2** | Measured paleoflow depth indicators in terrestrial fluvial sandstone bodies of the Last Chance Ferron Sandstone. The data that are listed as sourced in this study are the same data as those presented in Lyster et al. (2022)

| <b>Paleoflow depth proxy</b>                      | <b>Thickness (m)</b>                                                                                                                                                | <b>Source</b>                          |
|---------------------------------------------------|---------------------------------------------------------------------------------------------------------------------------------------------------------------------|----------------------------------------|
| <b>Point bar deposit</b>                          | 9.1                                                                                                                                                                 | Cotter (1971)                          |
| <b>Point bar deposit</b>                          | <8                                                                                                                                                                  | Gardner et al. (2004)                  |
| <b>Channel-fill deposits (maximum thickness)</b>  | ~9                                                                                                                                                                  | Gardner et al. (2004)                  |
| <b>Channel-fill deposits (maximum thickness)</b>  | ~9                                                                                                                                                                  | Garrison Jr and van den Bergh (2004)   |
| <b>Point bar deposits</b>                         | 8, 7.5, 9, 3.2, 4.8, 3.6, 6.5, 7.5, 3.6, 4.1, 2.7, 6.4, 5.5, 2.8, 1.1, 1.9, 7.5, 2.7, 7.1, 1.2, 4.4, 3.7, 3.1, 3.4, 3, 2.5, 5.9, 2.5, 4.7, 10, 4.2, 1.6, 3, 6.5, 10 | <b>This study/Lyster et al. (2022)</b> |
| <b>Single channel stories (maximum thickness)</b> | 8.6, 11.1, 12.2, 9, 7.6, 7.1, 3.9, 5.6, 2.6, 7.3, 12, 9.3                                                                                                           | <b>This study/Lyster et al. (2022)</b> |

**Table S3** | Field data collected in this study. The table is located in the attached Excel spreadsheet in the sheet named “Data”.

- Allen, J. R. L. (1965). Fining-upwards cycles in alluvial successions. *Geological Journal*, 4(2), 229-246. DOI:10.1002/gj.3350040201
- Andrews, E. D. (1984). Bed-material entrainment and hydraulic geometry of gravel-bed rivers in Colorado. *GSA Bulletin*, 95(3), 371-378. DOI:10.1130/0016-7606(1984)95<371:BEAHGO>2.0.CO;2
- Bhattacharya, J. P., & Tye, R. S. (2004). Searching for Modern Ferron Analogs and Application to Subsurface Interpretation. In T. C. Chidsey, Jr., R. D. Adams, & T. H. Morris (Eds.), *Regional to Wellbore Analog for Fluvial-Deltaic Reservoir Modeling: The Ferron Sandstone of Utah* (Vol. 50, pp. 0). American Association of Petroleum Geologists. <https://doi.org/10.1306/St50983>
- Chamberlin, E. P., & Hajek, E. A. (2019). Using bar preservation to constrain reworking in channel-dominated fluvial stratigraphy. *Geology*, 47(6), 531-534. DOI:10.1130/G46046.1
- Cotter, E. (1971). Paleoflow characteristics of a late Cretaceous river in Utah from analysis of sedimentary structures in the Ferron sandstone. *Journal of Sedimentary Research* 41, 129–138. DOI:10.1306/74D72202-2B21-11D7-8648000102C1865D
- Cox, P. M., Huntingford, C., & Harding, R. J. (1998). A canopy conductance and photosynthesis model for use in a GCM land surface scheme. *Journal of Hydrology*, 212-213, 79-94. DOI:10.1016/S0022-1694(98)00203-0
- Craggs, H. J., Valdes, P. J., & Widdowson, M. (2012). Climate model predictions for the latest Cretaceous: An evaluation using climatically sensitive sediments as proxy indicators. *Palaeogeography, Palaeoclimatology, Palaeoecology*, 315-316(Supplement C), 12-23. DOI:10.1016/j.palaeo.2011.11.004
- Farnsworth, A., Lunt, D. J., O'Brien, C., Foster, G. L., Inglis, G. N., Markwick, P., Pancost, R. D., & Robinson, S. A. (2019). Climate sensitivity on geological timescales controlled by non-linear feedbacks and ocean circulation. *Geophysical Research Letters*, 0(ja). DOI:10.1029/2019GL083574
- Ferguson, R. I., & Church, M. (2004). A simple universal equation for grain settling velocity. *Journal of Sedimentary Research*, 74(6), 933-937. DOI:10.1306/051204740933
- Foster, G. L., Royer, D. L., & Lunt, D. J. (2017). Future climate forcing potentially without precedent in the last 420 million years [Article]. *Nature Communications*, 8, 14845. DOI:10.1038/ncomms14845
- Ganti, V., Hajek, E. A., Leary, K., Straub, K. M., & Paola, C. (2020). Morphodynamic hierarchy and the fabric of the sedimentary record. *Geophysical Research Letters*, 47(14), e2020GL087921. DOI:10.1029/2020GL087921
- Ganti, V., Whittaker, A., Lamb, M. P., & Fischer, W. W. (2019). Low-gradient, single-threaded rivers prior to greening of the continents. *Proceedings of the National Academy of Sciences*, 116(4), 11652-11657. DOI:10.1073/pnas.1901642116
- García, M., & Parker, G. (1991). Entrainment of Bed Sediment Into Suspension. *Journal of Hydraulic Engineering-asce - J HYDRAUL ENG-ASCE*, 117. DOI:10.1061/(ASCE)0733-9429(1991)117:4(414)
- Gardner, M. H., Cross, T. A., & Levorsen, M. (2004). Stacking Patterns, Sediment Volume Partitioning, and Facies Differentiation in Shallow-Marine and Coastal-Plain Strata of the Cretaceous Ferron Sandstone, Utah. In T. C. Chidsey, Jr., R. D. Adams, & T. H. Morris (Eds.), *Regional to Wellbore Analog for Fluvial-Deltaic Reservoir Modeling: The Ferron Sandstone of Utah* (Vol. 50, pp. 0). American Association of Petroleum Geologists. <https://doi.org/10.1306/St50983>
- Garrison Jr, J. R., & van den Bergh, T. C. V. (2004). High-Resolution Depositional Sequence Stratigraphy of the Upper Ferron Sandstone Last Chance Delta: An Application of Coal-Zone Stratigraphy. In T. C. Chidsey, Jr., R. D. Adams, & T. H. Morris (Eds.), *Regional to Wellbore Analog for Fluvial-Deltaic Reservoir Modeling: The Ferron Sandstone of Utah* (Vol. 50, pp. 0). American Association of Petroleum Geologists. <https://doi.org/10.1306/St50983>

- Hajek, E. A., & Heller, P. L. (2012). Flow-depth scaling in alluvial architecture and nonmarine sequence stratigraphy: Example from the Castlegate Sandstone, central Utah, U.S.A. *Journal of Sedimentary Research*, 82(2), 121-130. DOI:10.2110/jsr.2012.8
- Jerolmack, D. J., & Mohrig, D. (2005). Frozen dynamics of migrating bedforms. *Geology*, 33(1), 57-60. DOI:10.1130/G20897.1
- Kean, J. W., & Smith, J. D. (2006). Form drag in rivers due to small-scale natural topographic features: 1. Regular sequences. *Journal of Geophysical Research: Earth Surface*, 111(F4). DOI:10.1029/2006JF000467
- Leary, K. C. P., & Ganti, V. (2020). Preserved fluvial cross strata record bedform disequilibrium dynamics. *Geophysical Research Letters*, 47(2), e2019GL085910. DOI:10.1029/2019GL085910
- Leclair, S. F. (2002). Preservation of cross-strata due to the migration of subaqueous dunes: an experimental investigation. *Sedimentology*, 49(6), 1157-1180. DOI:10.1046/j.1365-3091.2002.00482.x
- Leclair, S. F., & Bridge, J. S. (2001). Quantitative interpretation of sedimentary structures formed by river dunes. *Journal of Sedimentary Research*, 71(5), 713-716. DOI:1527-1404/01/071-713/\$03.00
- Lunt, D., Farnsworth, A., Loptson, C., Foster, G., Markwick, P., O'Brien, C., Pancost, R. D., Robinson, S. A., & Wrobel, N. (2016). Palaeogeographic controls on climate and proxy interpretation. *Climate of the Past*, 12, 1181-1198. DOI:10.5194/cpd-11-5683-2015
- Lunt, D. J., Ross, I., Hopley, P. J., & Valdes, P. J. (2007). Modelling Late Oligocene C4 grasses and climate. *Palaeogeography, Palaeoclimatology, Palaeoecology*, 251(2), 239-253. DOI:10.1016/j.palaeo.2007.04.004
- Lyster, S. J., Whittaker, A. C., Hajek, E. A., & Ganti, V. (2022). Field evidence of bedform disequilibrium dynamics in preserved fluvial cross-strata: Discharge variability or morphodynamic hierarchy? *Earth and Planetary Science Letters*, 579, 117355. DOI:10.1016/j.epsl.2021.117355
- Lyster, S. J., Whittaker, A. C., Hampson, G. J., Hajek, E. A., Allison, P. A., & Lathrop, B. A. (2021). Reconstructing the morphologies and hydrodynamics of ancient rivers from source to sink: Cretaceous Western Interior Basin, Utah, USA. *Sedimentology*, 68(6), 2854-2886. DOI:10.1111/sed.12877
- Mahon, R. C., & McElroy, B. (2018). Indirect estimation of bedload flux from modern sand-bed rivers and ancient fluvial strata. *Geology*, 46(7), 579-582. DOI:10.1130/G40161.1
- Paola, C., & Borgman, L. (1991). Reconstructing random topography from preserved stratification. *Sedimentology*, 38(4), 553-565. DOI:10.1111/j.1365-3091.1991.tb01008.x
- Parker, G. (2004). *1D Sediment Transport Morphodynamics with Applications to Rivers and Turbidity Currents*.
- Reesink, A. J. H., Van den Berg, J. H., Parsons, D. R., Amsler, M. L., Best, J. L., Hardy, R. J., Orfeo, O., & Szupiany, R. N. (2015). Extremes in dune preservation: Controls on the completeness of fluvial deposits. *Earth-Science Reviews*, 150, 652-665. DOI:10.1016/j.earscirev.2015.09.008
- Tindall, J., Flecker, R., Valdes, P., Schmidt, D. N., Markwick, P., & Harris, J. (2010). Modelling the oxygen isotope distribution of ancient seawater using a coupled ocean-atmosphere GCM: Implications for reconstructing early Eocene climate. *Earth and Planetary Science Letters*, 292(3-4), 265-273. DOI:10.1016/j.epsl.2009.12.049
- Trampush, S. M., Huzurbazar, S., & McElroy, B. (2014). Empirical assessment of theory for bankfull characteristics of alluvial channels. *Water Resources Research*, 50(12), 9211-9220. DOI:10.1002/2014WR015597
- Valdes, P. J., Armstrong, E., Badger, M. P. S., Bradshaw, C. D., Bragg, F., Crucifix, M., Davies-Barnard, T., Day, J. J., Farnsworth, A., Gordon, C., Hopcroft, P. O., Kennedy, A. T., Lord, N. S., Lunt, D. J., Marzocchi, A., Parry, L. M., Pope, V., Roberts, W. H. G., Stone, E. J., Tourte, G. J. L., & Williams, J. H. T. (2017). The BRIDGE HadCM3 family of climate models:

HadCM3@Bristol v1.0. *Geoscientific Model Development*, 10(10), 3715-3743.

DOI:10.5194/gmd-10-3715-2017

van Rijn, L. C. (1984). Sediment transport, part II: Suspended load transport. *Journal of Hydraulic Engineering*, 110(11), 1613-1641. DOI:10.1061/(ASCE)0733-9429(1984)110:11(1613)

Wright, S., & Parker, G. (2004). Flow resistance and suspended load in sand-bed rivers: Simplified stratification model. *Journal of Hydraulic Engineering*, 130(8), 796-805.

DOI:10.1061/(ASCE)0733-9429(2004)130:8(796)
