# Supplementary material
Source: publisher figshare collection journal article supplement (https://gsapubs.figshare.com/articles/dataset/_/23900253)
Supplement: Supplementary file 1 [file 1]

## Sheet: Data
Heights of channel architectural elements (m)	Median grain-size of cross-sets (mm)	Gravel grain-sizes (mm)								Thickness distributions of individually measured cross-sets (m)
8	1.5	11	22	7	23	3	2	5	15	0.1	0.25	0.2	0.08	0.5	0.43	0.23	0.13	0.1	0.25	0.03	0.02	0.12	0.12	0.02	0.4	0.64	0.42	0.21	0.41	0.13	0.15	0.23	0.06	0.04	0.09	0.12	0.16	0.2	0.12	0.29	0.1	0.13	0.04	0.04	0.05	0.59	0.03	0.54	0.06
7.5	0.375	9	10	3	3	2	10	3	2	0.22	0.4	0.26	0.2	0.47	0.4	0.16	0.16	0.17	0.3	0.08	0.06	0.17	0.14	0.04	0.34	0.58	0.33	0.24	0.34	0.15	0.18	0.22	0.08	0.06	0.11	0.13	0.16	0.2	0.19	0.18	0.14	0.18	0.12	0.1	0.11	0.53	0.14	0.49	0.08
9	2	4	12	3	11	11	5	5	9	0.3	0.5	0.35	0.3	0.42	0.37	0.1	0.18	0.2	0.35	0.13	0.1	0.22	0.19	0.07	0.3	0.48	0.28	0.25	0.3	0.22	0.26	0.19	0.12	0.09	0.12	0.11	0.17	0.17	0.2	0.12	0.08	0.24	0.15	0.13	0.2	0.5	0.21	0.43	0.09
3.2	1.5	11	16	11	7	5	5	2	2	0.26	0.51	0.45	0.35	0.4	0.3	0.07	0.19	0.21	0.19	0.18	0.14	0.25	0.24	0.12	0.2	0.44	0.25	0.28	0.27	0.29	0.3	0.16	0.16	0.23	0.1	0.1	0.14	0.16	0.32	0.12	0.22	0.29	0.25	0.19	0.23	0.47	0.23	0.4	0.13
4.8	2	3	17	13	18	10	2	4	2	0.37	0.42	0.48	0.43	0.25	0.26	0.06	0.1	0.21	0.12	0.24	0.17	0.28	0.31	0.13	0.2	0.24	0.19	0.2	0.24	0.3	0.34	0.1	0.19	0.25	0.08	0.09	0.12	0.13	0.42	0.1	0.24	0.3	0.28	0.19	0.33	0.45	0.26	0.36	0.18
3.6	0.75	3	10	8	3	2	21	2	8	0.45	0.4	0.35	0.52	0.21	0.15	0.04	0.08	0.19	0.05	0.3	0.23		0.35	0.14	0.19	0.16	0.14	0.14	0.2	0.27	0.3	0.08	0.21	0.26	0.07	0.07	0.08	0.11	0.49	0.09	0.28		0.36	0.17	0.36	0.43	0.29	0.33	0.24
6.5	0.75	3	8	15	11	3	4	4	3	0.4	0.4	0.24	0.51	0.22	0.09		0.05	0.08		0.35	0.28		0.34	0.16	0.14	0.09	0.09	0.12	0.16	0.26	0.21	0.05	0.21	0.29	0.05		0.07	0.09	0.45	0.08	0.35		0.44	0.16	0.4	0.34	0.32	0.26	0.18
7.5	0.75	3	3	6	4	2	7	5	2	0.33	0.32	0.2	0.49	0.19	0.05			0.12		0.36	0.27		0.3	0.2	0.14	0.05	0.05			0.24	0.18		0.24	0.3				0.04	0.47	0.06			0.5	0.15	0.41	0.27	0.35	0.2	0.1
3.6	1.5	5	10	11	40	4	3	3	2	0.2	0.18	0.15	0.49	0.15				0.07		0.29	0.24		0.25	0.23						0.22	0.14		0.3	0.3									0.57	0.13	0.44		0.36	0.23
4.1	1.5	5	27	4	18	4	6	8	4	0.1	0.14		0.48					0.13			0.2		0.2	0.18						0.17	0.1		0.35										0.57	0.11	0.43		0.38	0.19
2.7	1.5	7	12	8	22	3	3	5	2	0.05	0.05		0.45					0.13					0.16	0.15																			0.56	0.07	0.43		0.41	0.14
6.4	1.5	11	13	18	3	3	3	5	2				0.4					0.1					0.11																				0.62	0.05	0.36		0.42	0.14
5.5	1.5	7	7	4	4	4	5	4	3									0.05					0.08																						0.33		0.35	0.1
2.8	0.75	6	4	7	4	4	4	4	2									0.02					0.05																						0.28		0.32
1.1	0.75	7	4	3	15	7	3	4	2																																				0.28
1.9	0.75	3	5	4	9	9	3	2	4																																				0.24
7.5	1	3	4	5	10	5	4	4	2
2.7	1	4	7	4	3	10	3	6	2
7.1	1	8	20	12	4	4	2	5	2
1.2	1	4	10	5	5	5	4	4	2
4.4	0.75	5	15	20	5	3	3	5	2
3.7	0.75	5	13	8	3	7	2	2	6
3.1	0.75	3	4	25	3	4	2	3	2
3.4	0.375	6	6	4	20	3	7	2	2
3	0.75	5	11	10	15	3	4	3	2
2.5	0.75	10	8	18	4	2	5	3	2
5.9	0.75	13	8	3	8	3	9	2	2
2.5	0.75	7	11	2	5	3	2	4	3
4.7	1.5	6	4	10	4	4	5	2	2
10	0.75	3	3	3	27	4	2	4	2
4.2	0.75	3	6	5	10	3	3	2	2
1.6	1.5	9	6	3	3	2	2	5	2
3	1.5	5	3	5	3	11	4	4	2
6.5	0.375	6	10	5	3	9	6	4	4
10	0.75	15	14	8	5	4	2	5	2
8.6	0.375	6	16	9	7	5	2	3	2
11.1	0.75	3	11	4	6	7	4	8	27
12.2	0.5	5	8	7	6	5	7	4	2
9	0.5	4	5	10	4	6	2	5	3
7.6	0.375	3	3	4	5	6	4	5	2
7.1	0.5	4	8	5	10	4	6	3	2
3.9	0.5	4	4	10	33	3	4	3	3
5.6	0.75	9	5	10	15	5	4	2	2
2.6	0.75	6	4	5	4	4	6	2	3
7.3	0.75	5	7	4	20	3	2	3	2
12	0.75	4	10	7	7	7	3	6	2
9.3	0.75	3	5	9	20	3	5	3	3
9.1	0.75	3	10	8	15	7	4	3	2
8	1.5	7	3	6	11	2	4	3	2
9	3	6	5	12	12	6	5	5	2
9	1.5	4	3	4	40	6	9	4	2
	0.5	11	6	8	13	3	3	5	3
	0.5	5	3	5	10	3	4	2	2
	0.75	7	3	22	4	4	4	2	2
	0.5	4	5	4	3	5	4	4	2
	0.5	6	10	6	4	2	3	4	2
	0.5	5	10	14	5	3	4	4	2
	0.5	3	6	11	2	3	4	2	2
	0.75	6	3	4	5	2	2	2	2
	0.5	4	5	19	5	5	2	7	2
	0.5	5	8	12	10	5	5	3
	0.375	7	5	7	10	2	3	2
	0.5	8	6	10	7	7	6	2
	0.75	6	5	8	3	9	6	4
	0.75	4	14	10	4	4	2	6
	0.75	3	15	9	3	2	4	4
	0.75	4	9	10	3	3	11	5
	0.75	4	9	9	3	5	4	2
	0.75	5	8	13	4	5	12	2
	0.75	9	6	6	10	3	2	7
	0.75	5	10	5		3	4	4
	0.75	16	17	3		3	4	2
	0.75	6	3	5		2	2	4
	0.75	5	7	5		5	3	3
	0.75	6	5	5		2	2	4
	0.75	3	15	4		4	3	2
	0.75	3	14	15		3	4	2
	0.75	4	3	8		10	5	5
	0.75	11	8	4		4	4	5
	0.75	3	3	5		3	4	11
	0.75	15	14	3		2	9	5
	0.75	10	3	6		7	3	2
	0.5	5	7	8		2	2	5
	0.5	6	6	6		8	13	4
	0.5	7	12	15		6	2	10
	0.5	10	6	3		7	4	40
	0.5	6	3	10		8	4	14
	0.5	9	6	7		6	2	5
	0.5	5	3	3		8	3	5
	0.5	8	8	5		2	4	7
	0.75	6	10	7		3	4	10
	0.75	4	4	11		2	3	5
	0.75	3	10	3		5	7	3
	0.5	7	7	9		4	2	3
	1	15	3	4		2	2	4
	0.75	10	13	7		3	2	9
	0.75	5	15	4		4	2	6
	0.75	4	4	8		7	3	3
	0.75	3	12	5		5	2	12
	1.5	4	8	11		3	2	4
	0.75		4					14
	0.75		12					5
	0.75							3
	0.75							3
	0.75							2
	0.5							8
	0.75							13
	0.75							5
	0.5							2
	0.5							4
	0.5
	0.5
	0.5
	0.5
	0.5
	0.5
	0.75
	0.75
	0.5
	0.75
	0.5
	0.5
	0.5
	0.5
	0.5
	0.75
	0.75
	0.75
	0.75
	0.75
	0.5
	0.75
	0.75
	0.75
	0.75
	0.5
	0.75
	0.75
	1.5
	0.5
	0.5
	0.5
	0.75
	0.75
	0.75
	0.5
	0.5
	0.5
	0.75
	0.75
	0.5
	0.5
	0.5
	0.5
	0.5
	0.75
	0.75
	0.5
	0.5
	0.75
	0.5
	0.5
	1.5
	1.5
	1.5
	0.5
	0.5
	1.5
	0.75
	1.5
	0.75
	0.75
	0.75
	0.75
	0.75
	0.75
	0.75
	1
	0.75
	1
	0.375
	0.375
	0.5
	0.375
	0.5
	0.75
	0.5
	0.75
	0.5
	0.75
[truncated: 150 more columns]
